# Supplementary material for: Syntheses, structural diversity and photocatalytic properties of various Co(ii) coordination polymers based on a “V”-shaped 1,3-di(4′-carboxyl-phenyl)benzene acid and different imidazole bridging ligands
Source: Royal Society of Chemistry journal article supplement (doi:10.1039/c5ce02473k), 2016-01-01
Supplement: c5ce02473k1.pdf [file c5ce02473k1.pdf]

**Table S1** † Selected bond lengths (Å) and angles (°) for complexes **1-4**

| Complex 1                                                                                               |            |                                              |            |
|---------------------------------------------------------------------------------------------------------|------------|----------------------------------------------|------------|
| Co(1)-O(1)                                                                                              | 2.021(4)   | Co(1)-O(2) <sup>#1</sup>                     | 2.027(5)   |
| Co(1)-N(2)                                                                                              | 2.109(5)   | Co(1)-N(6)                                   | 2.133(5)   |
| Co(1)-O(6)                                                                                              | 2.199(5)   | Co(1)-O(5)                                   | 2.208(4)   |
| Co(2)-O(8) <sup>#2</sup>                                                                                | 2.023(4)   | Co(2)-O(7) <sup>#3</sup>                     | 2.027(5)   |
| Co(2)-O(4) <sup>#4</sup>                                                                                | 2.126(4)   | Co(2)-N(4)                                   | 2.150(5)   |
| Co(2)-N(8) <sup>#5</sup>                                                                                | 2.159(5)   | Co(2)-O(3) <sup>#4</sup>                     | 2.224(5)   |
| O(8)-Co(2) <sup>#9</sup>                                                                                | 2.023(4)   | N(8)-Co(2) <sup>#6</sup>                     | 2.159(5)   |
| O(2)-Co(1) <sup>#1</sup>                                                                                | 2.027(5)   | O(3)-Co(2) <sup>#7</sup>                     | 2.224(5)   |
| O(4)-Co(2) <sup>#7</sup>                                                                                | 2.126(4)   | O(7)-Co(2) <sup>#8</sup>                     | 2.027(5)   |
| O(3) <sup>#4</sup> -Co(2)-C(8) <sup>#4</sup>                                                            | 30.1(2)    | O(1)-Co(1)-O(2) <sup>#1</sup>                | 104.63(18) |
| O(1)-Co(1)-N(2)                                                                                         | 87.46(19)  | O(2) <sup>#1</sup> -Co(1)-N(2)               | 87.39(19)  |
| O(1)-Co(1)-N(6)                                                                                         | 95.27(19)  | O(2) <sup>#1</sup> -Co(1)-N(6)               | 90.40(19)  |
| N(2)-Co(1)-N(6)                                                                                         | 176.9(2)   | O(1)-Co(1)-O(6)                              | 91.36(19)  |
| O(2) <sup>#1</sup> -Co(1)-O(6)                                                                          | 163.80(18) | N(2)-Co(1)-O(6)                              | 90.79(18)  |
| N(6)-Co(1)-O(6)                                                                                         | 90.70(19)  | O(1)-Co(1)-O(5)                              | 152.2(2)   |
| O(2) <sup>#1</sup> -Co(1)-O(5)                                                                          | 103.13(19) | N(2)-Co(1)-O(5)                              | 92.79(19)  |
| N(6)-Co(1)-O(5)                                                                                         | 85.52(19)  | O(6)-Co(1)-O(5)                              | 60.86(18)  |
| O(8) <sup>#2</sup> -Co(2)-O(7) <sup>#3</sup>                                                            | 101.55(18) | O(8) <sup>#2</sup> -Co(2)-O(4) <sup>#4</sup> | 154.7(2)   |
| O(7) <sup>#3</sup> -Co(2)-O(4) <sup>#4</sup>                                                            | 103.7(2)   | O(8) <sup>#2</sup> -Co(2)-N(4)               | 91.7(2)    |
| O(7) <sup>#3</sup> -Co(2)-N(4)                                                                          | 91.82(18)  | O(4) <sup>#4</sup> -Co(2)-N(4)               | 86.66(19)  |
| O(8) <sup>#2</sup> -Co(2)-N(8) <sup>#5</sup>                                                            | 89.32(19)  | O(7) <sup>#3</sup> -Co(2)-N(8) <sup>#5</sup> | 90.75(18)  |
| O(4) <sup>#4</sup> -Co(2)-N(8) <sup>#5</sup>                                                            | 91.21(19)  | N(4)-Co(2)-N(8) <sup>#5</sup>                | 177.0(2)   |
| O(8) <sup>#2</sup> -Co(2)-O(3) <sup>#4</sup>                                                            | 93.87(18)  | O(7) <sup>#3</sup> -Co(2)-O(3) <sup>#4</sup> | 164.57(18) |
| O(4) <sup>#4</sup> -Co(2)-O(3) <sup>#4</sup>                                                            | 60.90(18)  | N(4)-Co(2)-O(3) <sup>#4</sup>                | 87.97(18)  |
| N(8) <sup>#5</sup> -Co(2)-O(3) <sup>#4</sup>                                                            | 89.14(18)  | O(8) <sup>#2</sup> -Co(2)-C(8) <sup>#4</sup> | 123.9(3)   |
| O(7) <sup>#3</sup> -Co(2)-C(8) <sup>#4</sup>                                                            | 134.5(3)   | O(4) <sup>#4</sup> -Co(2)-C(8) <sup>#4</sup> | 30.8(2)    |
| N(4)-Co(2)-C(8) <sup>#4</sup>                                                                           | 85.8(2)    | N(8) <sup>#5</sup> -Co(2)-C(8) <sup>#4</sup> | 91.2(2)    |
| Symmetry codes: #1: -x + 1, -y, -z + 1    #2: x + 1, -y + 1/2, z + 1/2    #3: -x + 1, y + 1/2, -z + 1/2 |            |                                              |            |
| #4: x, -y + 1/2, z - 1/2    #5: x + 1, y + 1, z    #6: x - 1, y - 1, z                                  |            |                                              |            |
| #7: x, -y + 1/2, z + 1/2    #8: -x + 1, y - 1/2, -z + 1/2    #9: x - 1, -y + 1/2, z - 1/2               |            |                                              |            |
| Complex 2                                                                                               |            |                                              |            |
| Co(1)-O(1) <sup>#1</sup>                                                                                | 1.944(3)   | Co(1)-O(1)                                   | 1.944(3)   |
| Co(1)-N(2) <sup>#1</sup>                                                                                | 2.047(4)   | Co(1)-N(2)                                   | 2.047(4)   |
| O(1) <sup>#1</sup> -Co(1)-O(1)                                                                          | 113.9(2)   | O(1) <sup>#1</sup> -Co(1)-N(2)               | 103.50(15) |
| O(1)-Co(1)-N(2)                                                                                         | 118.41(15) | O(1) <sup>#1</sup> -Co(1)-N(2) <sup>#1</sup> | 118.41(15) |
| O(1)-Co(1)-N(2) <sup>#1</sup>                                                                           | 103.50(15) | N(2)-Co(1)-N(2) <sup>#1</sup>                | 98.9(2)    |
| Symmetry codes: #1: -x + 1, y, -z + 3/2    #2: -x + 3/2, -y + 5/2, -z + 2                               |            |                                              |            |
| Complex 3                                                                                               |            |                                              |            |
| Co(1)-O(1) <sup>#1</sup>                                                                                | 2.083(2)   | Co(1)-O(1)                                   | 2.083(2)   |
| Co(1)-N(6) <sup>#2</sup>                                                                                | 2.150(3)   | Co(1)-N(6) <sup>#3</sup>                     | 2.150(3)   |
| Co(1)-N(2) <sup>#1</sup>                                                                                | 2.167(3)   | Co(1)-N(2)                                   | 2.167(3)   |

|                                                |            |                                              |            |
|------------------------------------------------|------------|----------------------------------------------|------------|
| Co(2)-O(3) <sup>#4</sup>                       | 1.948(3)   | Co(2)-O(3) <sup>#5</sup>                     | 1.948(3)   |
| Co(2)-N(4)                                     | 2.049(3)   | Co(2)-N(4) <sup>#6</sup>                     | 2.049(3)   |
| N(6)-Co(1) <sup>#7</sup>                       | 2.150(3)   | O(3)-Co(2) <sup>#8</sup>                     | 1.948(3)   |
| O(1) <sup>#1</sup> -Co(1)-O(1)                 | 180.00(5)  | O(1) <sup>#1</sup> -Co(1)-N(6) <sup>#2</sup> | 85.08(10)  |
| O(1)-Co(1)-N(6) <sup>#2</sup>                  | 94.92(10)  | O(1) <sup>#1</sup> -Co(1)-N(6) <sup>#3</sup> | 94.92(10)  |
| O(1)-Co(1)-N(6) <sup>#3</sup>                  | 85.08(10)  | N(6) <sup>#2</sup> -Co(1)-N(6) <sup>#3</sup> | 180.000(1) |
| O(1) <sup>#1</sup> -Co(1)-N(2) <sup>#1</sup>   | 84.98(11)  | O(1)-Co(1)-N(2) <sup>#1</sup>                | 95.02(11)  |
| N(6) <sup>#2</sup> -Co(1)-N(2) <sup>#1</sup>   | 90.63(11)  | N(6) <sup>#3</sup> -Co(1)-N(2) <sup>#1</sup> | 89.37(11)  |
| O(1) <sup>#1</sup> -Co(1)-N(2)                 | 95.02(11)  | O(1)-Co(1)-N(2)                              | 84.98(11)  |
| N(6) <sup>#2</sup> -Co(1)-N(2)                 | 89.37(11)  | N(6) <sup>#3</sup> -Co(1)-N(2)               | 90.63(11)  |
| N(2) <sup>#1</sup> -Co(1)-N(2)                 | 180.000(1) | O(3) <sup>#4</sup> -Co(2)-O(3) <sup>#5</sup> | 97.1(2)    |
| O(3) <sup>#4</sup> -Co(2)-N(4)                 | 102.62(13) | O(3) <sup>#5</sup> -Co(2)-N(4)               | 124.19(14) |
| O(3) <sup>#4</sup> -Co(2)-N(4) <sup>#6</sup>   | 124.19(14) | O(3) <sup>#5</sup> -Co(2)-N(4) <sup>#6</sup> | 102.62(13) |
| N(4)-Co(2)-N(4) <sup>#6</sup>                  | 107.77(17) |                                              |            |
| Symmetry codes: #1: -x + 3/2, -y + 1/2, -z + 1 |            | #2: x, -y + 1, z - 1/2                       |            |
| #3: -x + 3/2, y - 1/2, -z + 3/2                |            | #4: x, y + 1, z - 1                          |            |
| #5: -x + 1, y + 1, -z + 3/2                    |            | #6: -x + 1, y, -z + 1/2                      |            |
| #7: -x + 3/2, y + 1/2, -z + 3/2                |            | #8: x, y - 1, z + 1                          |            |

#### Complex 4

|                                                |           |                                |                             |
|------------------------------------------------|-----------|--------------------------------|-----------------------------|
| Co(1)-N(2')                                    | 1.97(18)  | Co(1)-N(2)                     | 2.06(12)                    |
| Co(1)-O(1)                                     | 2.050(3)  | Co(1)-O(2) <sup>#1</sup>       | 2.034(3)                    |
| Co(1)-O(3)                                     | 2.068(4)  | Co(1)-O(4) <sup>#1</sup>       | 2.012(4)                    |
| N(2')-Co(1)-O(4) <sup>#1</sup>                 | 105(6)    | N(2')-Co(1)-O(2) <sup>#1</sup> | 99(6)                       |
| O(4) <sup>#1</sup> -Co(1)-O(2) <sup>#1</sup>   | 91.15(14) | N(2')-Co(1)-O(1)               | 97(6)                       |
| O(4) <sup>#1</sup> -Co(1)-O(1)                 | 90.05(15) | O(2) <sup>#1</sup> -Co(1)-O(1) | 163.20(14)                  |
| N(2')-Co(1)-N(2)                               | 1(9)      | O(4) <sup>#1</sup> -Co(1)-N(2) | 106(3)                      |
| O(2) <sup>#1</sup> -Co(1)-N(2)                 | 99(4)     | O(1)-Co(1)-N(2)                | 97(4)                       |
| N(2')-Co(1)-O(3)                               | 92(6)     | O(4) <sup>#1</sup> -Co(1)-O(3) | 162.56(17)                  |
| O(2) <sup>#1</sup> -Co(1)-O(3)                 | 88.10(15) | O(1)-Co(1)-O(3)                | 85.78(15)                   |
| N(2)-Co(1)-O(3)                                | 91(3)     |                                |                             |
| Symmetry codes: #1: -x + 3/2, -y + 3/2, -z + 1 |           | #2: -x + 1, y, -z + 1/2        | #3: -x + 1, y - 1, -z + 1/2 |
| #4: -x + 1, y + 1, -z + 1/2                    |           | #5: -x + 1, -y + 1, -z + 1     |                             |

**Table S2** † The coordination modes of H<sub>2</sub>dpb ligand and the roles of ancillary ligands in complexes **1-4**

| Complex  | Coord. modes | Ancillary ligands/role | Dihedral angles (°) of H <sub>2</sub> dpb | Structure and topology                                                                                                                        |
|----------|--------------|------------------------|-------------------------------------------|-----------------------------------------------------------------------------------------------------------------------------------------------|
| <b>1</b> | Mode III     | 4,4'-Bibp/bridging     | 41.52(9)/41.96(6)/43.63(7)                | 3D 4-connected (6 <sup>5</sup> ·8)- <b>cds</b> net                                                                                            |
| <b>2</b> | Mode I       | 4,4'-Bibp/bridging     | 20.87(6)/34.16(6)/47.50(7)                | 1D chain $\longrightarrow$ 3D based supramolecular                                                                                            |
| <b>3</b> | Mode II      | Tib/chelating          | 24.61(4)/43.71(3)/56.83(3)                | 3D (3,4,6)-connected (6 <sup>2</sup> ·7) <sup>2</sup> (6 <sup>4</sup> ·7 <sup>5</sup> ·8 <sup>4</sup> ·9·10)(6 <sup>4</sup> ·8 <sup>2</sup> ) |

|   |         |               |                            |                                                                        |
|---|---------|---------------|----------------------------|------------------------------------------------------------------------|
|   |         |               |                            | unprecedented net                                                      |
| 4 | Mode IV | Bimb/bridging | 29.61(5)/57.67(5)/32.86(4) | 3D 6-connected (4 <sup>4</sup> ·6 <sup>11</sup> )<br>unprecedented net |

Fig. S1 † (a-d)

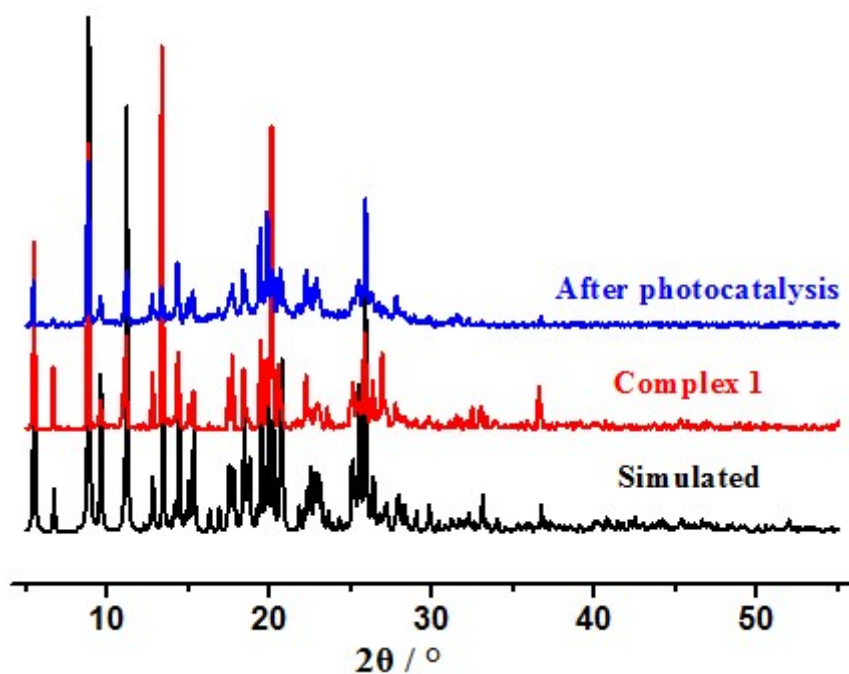

Fig. S1 † (a) PXR D patterns of complex 1 before and after photocatalysis process.

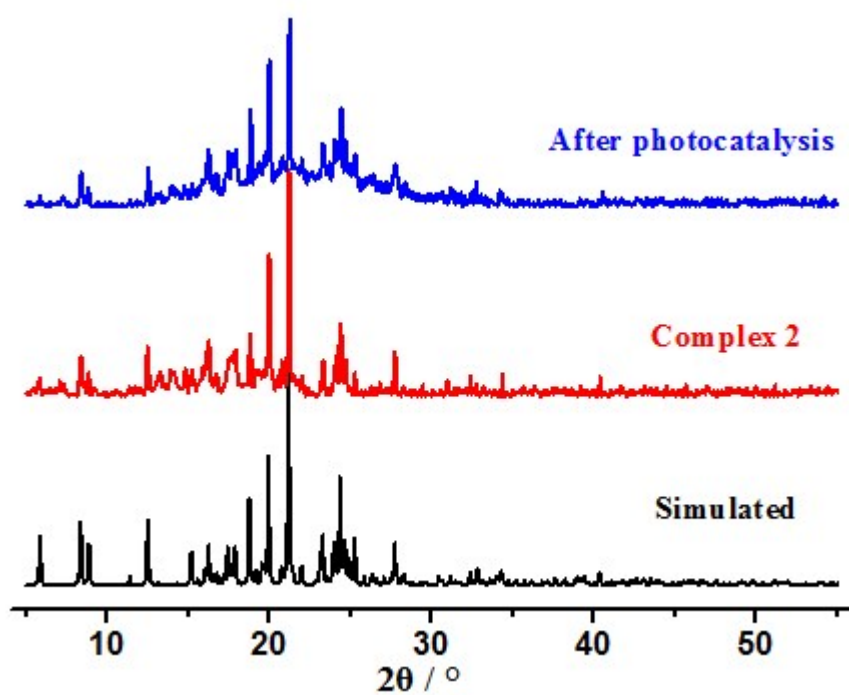

Fig. S1 † (b) PXR D patterns of complex 2 before and after photocatalysis process.

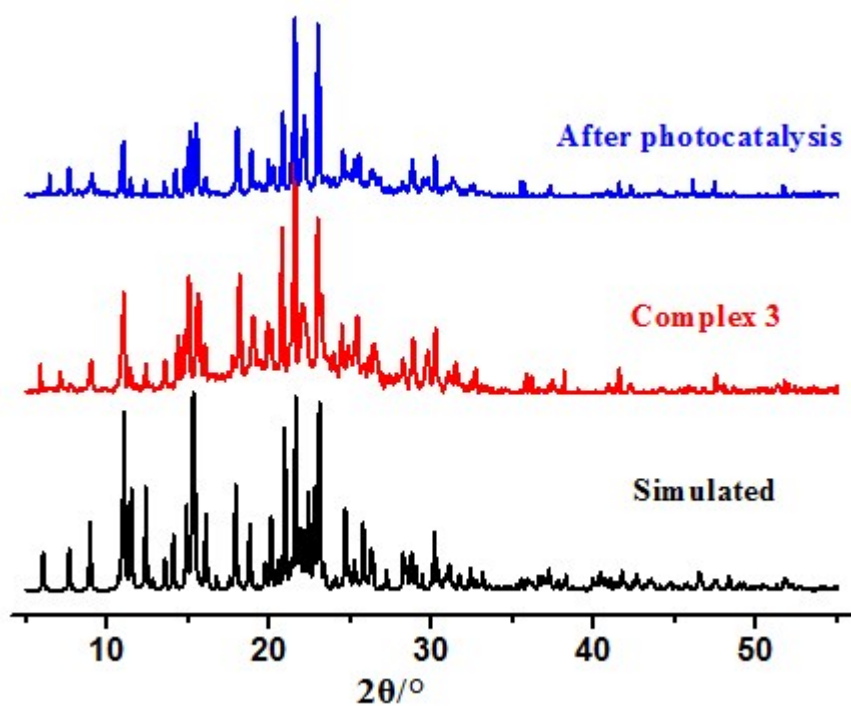

Fig. S1 † (c) PXRd patterns of complex 3 before and after photocatalysis process.

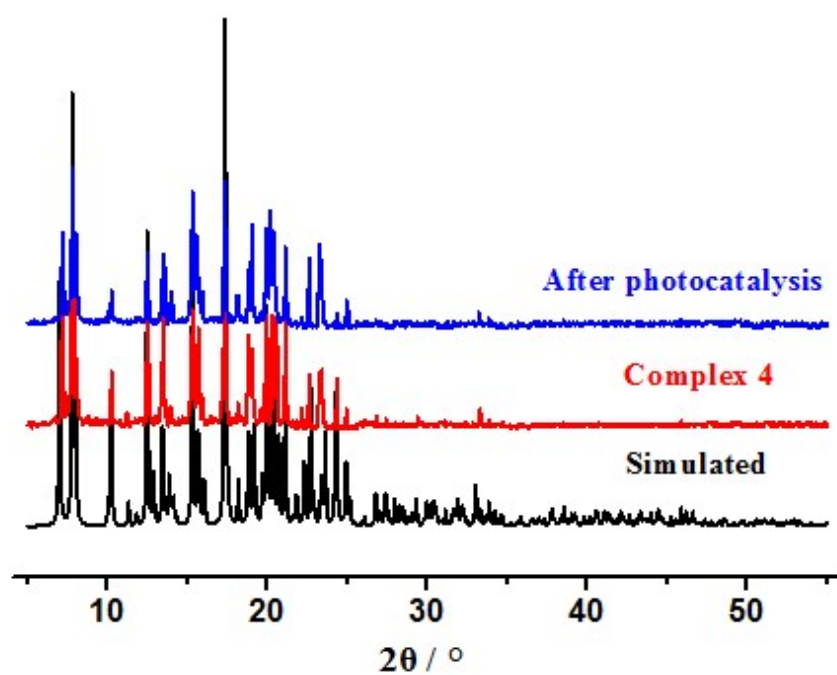

Fig. S1 † (d) PXRd patterns of complex 4 before and after photocatalysis process.
